# Supplementary material for: Plasma miRNA Biomarkers in Limited Volume Samples for Detection of Early-stage Pancreatic Cancer
Source: Oxford University Press journal article supplement (doi:10.1158/1940-6207.capr-20-0303), 2021-04-23
Supplement: 19406207capr200303-sup-245043_3_supp_7043835_qrb8t8.docx [file 19406207capr200303-sup-245043_3_supp_7043835_qrb8t8.docx]

**Supplementary Table 1.** MicroRNAs on the oncology Fireplex panel.

| **miRbase 20 name** | **miRNA sequence** |
| --- | --- |
| hsa-let-7d-5p | agagguaguagguugcauaguu |
| hsa-let-7g-5p | ugagguaguaguuuguacaguu |
| hsa-let-7i-5p | ugagguaguaguuugugcuguu |
| hsa-miR-103a-3p | agcagcauuguacagggcuauga |
| hsa-miR-106a-5p | aaaagugcuuacagugcagguag |
| hsa-miR-106b-5p | uaaagugcugacagugcagau |
| hsa-miR-107 | agcagcauuguacagggcuauca |
| hsa-miR-10b-5p | uacccuguagaaccgaauuugug |
| hsa-miR-122-5p | uggagugugacaaugguguuug |
| hsa-miR-125b-5p | ucccugagacccuaacuuguga |
| hsa-miR-126-3p | ucguaccgugaguaauaaugcg |
| hsa-miR-127-3p | ucggauccgucugagcuuggcu |
| hsa-miR-130a-3p | cagugcaauguuaaaagggcau |
| hsa-miR-141-3p | uaacacugucugguaaagaugg |
| hsa-miR-145-5p | guccaguuuucccaggaaucccu |
| hsa-miR-146a-5p | ugagaacugaauuccauggguu |
| hsa-miR-148a-3p | ucagugcacuacagaacuuugu |
| hsa-miR-148b-3p | ucagugcaucacagaacuuugu |
| hsa-miR-150-5p | ucucccaacccuuguaccagug |
| hsa-miR-151a-3p | cuagacugaagcuccuugagg |
| hsa-miR-155-5p | uuaaugcuaaucgugauaggggu |
| hsa-miR-15b-5p | uagcagcacaucaugguuuaca |
| hsa-miR-16-5p | uagcagcacguaaauauuggcg |
| hsa-miR-17-5p | caaagugcuuacagugcagguag |
| hsa-miR-181a-5p | aacauucaacgcugucggugagu |
| hsa-miR-181b-5p | uaaggugcaucuagugcagauag |
| hsa-miR-182-5p | aacauucauugcugucggugggu |
| hsa-miR-187-3p | ucgugucuuguguugcagccgg |
| hsa-miR-18a-5p | uaaggugcaucuagugcagauag |
| hsa-miR-192-5p | cugaccuaugaauugacagcc |
| hsa-miR-195-5p | uagcagcacagaaauauuggc |
| hsa-miR-199a-3p | acaguagucugcacauugguua |
| hsa-miR-199a-5p | cccaguguucagacuaccuguuc |
| hsa-miR-19a-3p | ugugcaaaucuaugcaaaacuga |
| hsa-miR-200b-3p | uaauacugccugguaaugauga |
| hsa-miR-200c-3p | uaauacugccggguaaugaugga |
| hsa-miR-205-5p | uccuucauuccaccggagucug |
| hsa-miR-20a-5p | uaaagugcuuauagugcagguag |
| hsa-miR-210-3p | cugugcgugugacagcggcuga |
| hsa-miR-21-5p | uagcuuaucagacugauguuga |
| hsa-miR-218-5p | uugugcuugaucuaaccaugu |
| hsa-miR-221-3p | agcuacauugucugcuggguuuc |
| hsa-miR-222-3p | agcuacaucuggcuacugggu |
| hsa-miR-223-3p | ugucaguuugucaaauacccca |
| hsa-miR-22-3p | aagcugccaguugaagaacugu |
| hsa-miR-25-3p | cauugcacuugucucggucuga |
| hsa-miR-26a-5p | uucaaguaauccaggauaggcu |
| hsa-miR-27a-3p | uucacaguggcuaaguuccgc |
| hsa-miR-29a-3p | uagcaccaucugaaaucgguua |
| hsa-miR-29b-3p | uagcaccauuugaaaucaguguu |
| hsa-miR-29c-3p | uagcaccauuugaaaucgguua |
| hsa-miR-320a | aaaagcuggguugagagggcga |
| hsa-miR-335-5p | ucaagagcaauaacgaaaaaugu |
| hsa-miR-34a-5p | uggcagugucuuagcugguugu |
| hsa-miR-34b-3p | caaucacuaacuccacugccau |
| hsa-miR-375 | uuuguucguucggcucgcguga |
| hsa-miR-376c-3p | aacauagaggaaauuccacgu |
| hsa-miR-378a-3p | acuggacuuggagucagaaggc |
| hsa-miR-409-3p | gaauguugcucggugaaccccu |
| hsa-miR-451a | aaaccguuaccauuacugaguu |
| hsa-miR-483-5p | aagacgggaggaaagaagggag |
| hsa-miR-486-5p | uccuguacugagcugccccgag |
| hsa-miR-574-3p | cacgcucaugcacacacccaca |
| hsa-miR-625-3p | gacuauagaacuuucccccuca |
| hsa-miR-652-3p | aauggcgccacuaggguugug |
| hsa-miR-92a-3p | uauugcacuugucccggccugu |
| hsa-mir-93-5p | caaagugcuguucgugcagguag |
| hsa-miR-9-5p | ucuuugguuaucuagcuguauga |

**Supplementary Table 1.** MicroRNAs on the oncology Fireplex panel.
